# Supplementary material
Source: MDPI journal article supplement (https://www.mdpi.com/2071-1050/15/20/15058)
Supplement: s1 [file s1]

**Table S1.** Multinomial model odds ratios and p-values.

| Predictors           | Disease patients |                     |         | Injuries        |                     |         |
|----------------------|------------------|---------------------|---------|-----------------|---------------------|---------|
|                      | OR <sup>/</sup>  | 95% CI <sup>/</sup> | p-value | OR <sup>/</sup> | 95% CI <sup>/</sup> | p-value |
| Sex:                 |                  |                     |         |                 |                     |         |
| Female               | —                | —                   |         | —               | —                   |         |
| Male                 | 0.06             | 0.00, 16.9          | 0.3     | 0.32            | 0.11, 0.92          | 0.035   |
| Experience:          |                  |                     |         |                 |                     |         |
| < 1 month            | —                | —                   |         | —               | —                   |         |
| 1–2 months           | 1.07             | 0.13, 8.58          | >0.9    | 0.75            | 0.48, 1.17          | 0.2     |
| 2–3 months           | 1.63             | 0.34, 7.87          | 0.5     | 0.89            | 0.48, 1.65          | 0.7     |
| 3–6 months           | 2.23             | 0.61, 8.17          | 0.2     | 0.47            | 0.29, 0.75          | 0.002   |
| 6–12 months          | 0.89             | 0.25, 3.18          | 0.9     | 0.51            | 0.31, 0.84          | 0.008   |
| 1–3 years            | 0.51             | 0.15, 1.77          | 0.3     | 0.39            | 0.24, 0.64          | <0.001  |
| 3–5 years            | 0.74             | 0.11, 4.88          | 0.8     | 0.83            | 0.26, 2.59          | 0.7     |
| 5+years              | 0.34             | 0.09, 1.27          | 0.11    | 1.32            | 0.47, 3.72          | 0.6     |
| Completion rate:     |                  |                     |         |                 |                     |         |
| 0–20%                | —                | —                   |         | —               | —                   |         |
| 20–40%               | 0.87             | 0.19, 4.09          | 0.9     | 1.65            | 1.12, 2.44          | 0.012   |
| 40–60%               | 0.97             | 0.24, 3.87          | >0.9    | 1.43            | 0.98, 2.08          | 0.062   |
| 60–80%               | 0.78             | 0.19, 3.17          | 0.7     | 2.02            | 1.35, 3.03          | <0.001  |
| 80%+                 | 1.38             | 0.45, 4.25          | 0.6     | 1.6             | 1.08, 2.36          | 0.018   |
| Number of employees: |                  |                     |         |                 |                     |         |
| <5                   | —                | —                   |         | —               | —                   |         |
| 5–9                  | 0.49             | 0.13, 1.80          | 0.3     | 0.64            | 0.43, 0.95          | 0.025   |
| 10–15                | 0.79             | 0.19, 3.31          | 0.7     | 0.69            | 0.44, 1.09          | 0.11    |
| 16–29                | 2.95             | 0.60, 14.5          | 0.2     | 1.21            | 0.73, 2.01          | 0.5     |
| 30–99                | 0.58             | 0.20, 1.72          | 0.3     | 0.59            | 0.40, 0.86          | 0.006   |
| 100–499              | 0.61             | 0.21, 1.73          | 0.4     | 0.51            | 0.34, 0.77          | 0.001   |
| 500+                 | 3.22             | 0.53, 19.7          | 0.2     | 0.65            | 0.33, 1.29          | 0.2     |
| Month of accident:   |                  |                     |         |                 |                     |         |
| January              | —                | —                   |         | —               | —                   |         |
| February             | 0.34             | 0.04, 2.68          | 0.3     | 1.5             | 0.76, 2.96          | 0.2     |
| March                | 5.15             | 0.02, 1,536         | 0.6     | 0.93            | 0.52, 1.65          | 0.8     |
| April                | 0.24             | 0.03, 1.71          | 0.2     | 2.27            | 1.15, 4.51          | 0.019   |
| May                  | 0.3              | 0.04, 2.45          | 0.3     | 1.3             | 0.72, 2.33          | 0.4     |
| June                 | 0.12             | 0.02, 0.79          | 0.027   | 1.03            | 0.56, 1.89          | >0.9    |
| July                 | 0.11             | 0.02, 0.69          | 0.019   | 1.03            | 0.58, 1.85          | >0.9    |
| August               | 0.22             | 0.03, 1.39          | 0.11    | 0.98            | 0.55, 1.75          | >0.9    |
| September            | 0.13             | 0.01, 1.22          | 0.074   | 1.76            | 0.93, 3.34          | 0.082   |
| October              | 0.44             | 0.06, 3.34          | 0.4     | 2.26            | 1.17, 4.34          | 0.015   |
| November             | 0.37             | 0.05, 2.89          | 0.3     | 1.16            | 0.65, 2.08          | 0.6     |
| December             | 0.2              | 0.03, 1.24          | 0.084   | 1.26            | 0.69, 2.31          | 0.5     |
| Accident hour:       |                  |                     |         |                 |                     |         |

| Predictors              | Disease patients |                     |         | Injuries        |                     |         |
|-------------------------|------------------|---------------------|---------|-----------------|---------------------|---------|
|                         | OR <sup>/</sup>  | 95% CI <sup>/</sup> | p-value | OR <sup>/</sup> | 95% CI <sup>/</sup> | p-value |
| 0:00                    | —                | —                   |         | —               | —                   |         |
| 1:00                    | 53.6             | 0.00, 2475          | 0.8     | 0.71            | 0.05, 9.22          | 0.8     |
| 2:00                    | 421              | 0.00, 4462          | 0.8     | 35.8            | 0.00, 72            | 0.8     |
| 3:00                    | 0.00             | 0.00, 3639          | 0.8     | 0.05            | 0.00, 0.66          | 0.023   |
| 4:00                    | 1                | 1.00, 1.00          | 0.2     | 58.3            | 0.00, 62            | 0.9     |
| 5:00                    | 0.13             | 0.00, 3.90          | 0.2     | 1.04            | 0.07, 14.4          | >0.9    |
| 6:00                    | 0.08             | 0.01, 1.28          | 0.075   | 0.18            | 0.04, 0.84          | 0.03    |
| 7:00                    | 0.17             | 0.01, 4.28          | 0.3     | 0.49            | 0.14, 1.77          | 0.3     |
| 8:00                    | 0.47             | 0.06, 3.71          | 0.5     | 0.45            | 0.14, 1.49          | 0.2     |
| 9:00                    | 0.67             | 0.15, 2.99          | 0.6     | 0.48            | 0.15, 1.58          | 0.2     |
| 10:00                   | 1.3              | 0.29, 5.82          | 0.7     | 0.52            | 0.16, 1.71          | 0.3     |
| 11:00                   | 0.2              | 0.03, 1.51          | 0.12    | 0.5             | 0.15, 1.66          | 0.3     |
| 12:00                   | 1.29             | 0.22, 7.53          | 0.8     | 0.56            | 0.16, 2.05          | 0.4     |
| 13:00                   | 0.31             | 0.02, 4.24          | 0.4     | 0.36            | 0.11, 1.22          | 0.1     |
| 14:00                   | 0.22             | 0.04, 1.36          | 0.1     | 0.61            | 0.18, 2.02          | 0.4     |
| 15:00                   | 2.54             | 0.29, 22.6          | 0.4     | 0.62            | 0.19, 2.08          | 0.4     |
| 16:00                   | 1.14             | 0.19, 6.66          | 0.9     | 0.82            | 0.24, 2.81          | 0.8     |
| 17:00                   | 0.38             | 0.03, 4.84          | 0.5     | 0.35            | 0.09, 1.41          | 0.14    |
| 18:00                   | 0.12             | 0.01, 1.49          | 0.1     | 0.53            | 0.09, 3.00          | 0.5     |
| 19:00                   | 0.13             | 0.01, 1.65          | 0.11    | 0.11            | 0.01, 0.76          | 0.026   |
| 20:00                   | 6.37             | 0.08, 487           | 0.4     | 0.12            | 0.01, 1.30          | 0.08    |
| 21:00                   | 117              | 0.00, 228           | 0.7     | 0.19            | 0.01, 2.83          | 0.2     |
| 22:00                   | 0.14             | 0.01, 3.03          | 0.2     | 0.08            | 0.00, 1.60          | 0.1     |
| 23:00                   | 0.00             | 0.00, 51            | 0.9     | 0.21            | 0.02, 1.79          | 0.2     |
| Diagnosis:              |                  |                     |         |                 |                     |         |
| Abdomen, lower back     | —                | —                   |         | —               | —                   |         |
| Ankle and foot          | 56.2             | 0.00, 1958          | >0.9    | 1297            | 0.00, 254           | 0.5     |
| Burns and corrosions    | 0.00             | 0.00, 66            | 0.8     | 0.2             | 0.06, 0.73          | 0.015   |
| Circulatory system      | 0.00             | 0.00, 42            | 0.8     | 0               | 0.00, 0.01          | <0.001  |
| Ear and mastoid process | 3765             | 0.00, 8647          | >0.9    | 233             | 0.00, 7             | 0.9     |
| Elbow and forearm       | 142              | 0.00, 333           | >0.9    | 1162            | 0.00, 9             | 0.5     |
| Head                    | 0.00             | 0.00, 361           | 0.8     | 0.04            | 0.02, 0.07          | <0.001  |
| Hip and thigh           | 10.1             | 0.00, 779           | >0.9    | 3.83            | 0.50, 29.6          | 0.2     |
| Knee and lower leg      | 47               | 0.00, 20            | 0.8     | 6.59            | 1.48, 29.2          | 0.013   |
| Musculoskeletal system  | 47.2             | 0.00, 23583         | 0.9     | 0.07            | 0.01, 0.34          | <0.001  |
| Neck                    | 0.32             | 0.00, 15            | >0.9    | 0.13            | 0.06, 0.28          | <0.001  |
| Others                  | 0.00             | 0.00, 30            | 0.8     | 0.02            | 0.01, 0.04          | <0.001  |
| Respiratory system      | 0.00             | 0.00, 98            | 0.8     | 0.01            | 0.00, 0.03          | <0.001  |
| Shoulder and upper arm  | 49.3             | 0.00, 234           | 0.8     | 5.55            | 0.72, 42.8          | 0.1     |
| Thorax                  | 1.3              | 0.00, 5             | >0.9    | 0.33            | 0.18, 0.63          | <0.001  |
| Wrist and hand          | 390              | 0.00, 736           | 0.6     | 1570            | 0.00, 500           | 0.3     |

Form of occurrence:

| Predictors                | Disease patients |                     |         | Injuries        |                     |         |
|---------------------------|------------------|---------------------|---------|-----------------|---------------------|---------|
|                           | OR <sup>1</sup>  | 95% CI <sup>1</sup> | p-value | OR <sup>1</sup> | 95% CI <sup>1</sup> | p-value |
| Building collapse         | —                | —                   |         | —               | —                   |         |
| Bump                      | 0.02             | 0.00, 16            | 0.8     | 5.23            | 2.23, 12.3          | <0.001  |
| Carelessness              | 2.26             | 0.00, 183           | >0.9    | 1680            | 0.00, 97            | 0.6     |
| Chemical contact          | 379              | 0.00, 154           | 0.7     | 2.82            | 0.78, 10.2          | 0.11    |
| Cutting and stabbing      | 0.61             | 0.00, 51            | >0.9    | 52.2            | 6.44, 423           | <0.001  |
| Diseases infection        | 220              | 0.00, 814           | 0.6     | 0.07            | 0.02, 0.30          | <0.001  |
| Electric shock            | 0.02             | 0.00, 842           | >0.9    | 2.85            | 0.78, 10.3          | 0.11    |
| Entrapment                | 0.00             | 0.00, 1             | 0.8     | 0.91            | 0.31, 2.67          | 0.9     |
| Explosion and rupture     | 0.2              | 0.00, 21            | >0.9    | 1.17            | 0.18, 7.70          | 0.9     |
| Extreme heat exposure     | 187              | 0.00, 1025          | 0.6     | 2794            | 0.00, 57            | 0.7     |
| Fall down                 | 0.3              | 0.00, 2             | >0.9    | 22.5            | 7.13, 70.9          | <0.001  |
| Fall from height          | 0.05             | 0.00, 392           | 0.7     | 1.27            | 0.61, 2.65          | 0.5     |
| Fire                      | 0.83             | 0.00, 15            | >0.9    | 1.34            | 0.26, 6.96          | 0.7     |
| Flip over(buried)         | 0.00             | 0.00, 1             | >0.9    | 1.68            | 0.68, 4.14          | 0.3     |
| Hit by an object          | 0.04             | 0.00, 177           | 0.9     | 9.97            | 4.30, 23.1          | <0.001  |
| Off-site traffic accident | 0.00             | 0.00, 145           | >0.9    | 0.6             | 0.22, 1.66          | 0.3     |
| Others                    | 0.03             | 0.00, 25            | >0.9    | 0.33            | 0.10, 1.07          | 0.065   |

OR<sup>1</sup> = Odds Ratio, CI = Confidence Interval
